# Supplementary material
Source: publisher figshare collection journal article supplement (https://acs.figshare.com/ndownloader/files/3824026)
Supplement: Supplementary file 1 [file 3824026]

**Supplementary Table 3: Graph database queries and query results.**

| Query No. | Query Description                                                                    | Query Result                                                          |
|-----------|--------------------------------------------------------------------------------------|-----------------------------------------------------------------------|
| 1         | Retrieve meta-proteins with proteins and peptides.                                   | 712 meta-proteins<br>1351 proteins<br>1140 peptides                   |
| 2         | Retrieve meta-proteins with proteins and peptides, excluding keratin.                | 702 meta-proteins<br>1236 proteins<br>947 peptides                    |
| 3         | Retrieve proteins grouped by meta-proteins, ontologies and taxonomies.               | 229 taxonomies<br>150 ontologies<br>428 meta-proteins<br>820 proteins |
| 4         | Retrieve proteins grouped by meta-proteins and taxonomies of methanogenesis pathway. | Protein P07962<br>(Methyl CoM Reductase)                              |
